1  
2  
3  
4  
5  
6  
7  
8  
9  
10  
11  
12  
13  
14  
15  
16  
17  
18  
19  
20  
21  
22  
23

# Refugee and asylum seekers' engagement with health services during pregnancy: A rapid review

Jennifer Green<sup>1</sup>, Jane Herbert<sup>1,2</sup>, Leissa Pitts<sup>3</sup>, Nyari Garakasha<sup>3</sup>, Lisa Gaye Smithers<sup>4\*</sup>

<sup>1</sup>Early Start, University of Wollongong, Northfields Avenue, Wollongong, NSW, Australia

<sup>2</sup>School of Psychology, University of Wollongong, Northfields Avenue, Wollongong, NSW, Australia

<sup>3</sup>Multicultural and Refugee Health Service, Illawarra Shoalhaven Local Health District, 67 King Street, Warrawong, NSW, Australia

<sup>4</sup>Discipline of Public Health, School of Health and Society, University of Wollongong, Northfields Avenue, Wollongong, NSW, Australia

\* Corresponding Author:

Email: [lsmithers@uow.edu.au](mailto:lsmithers@uow.edu.au)

## 24 Abstract

25 The objective of this work was to summarise and describe antenatal care experiences of  
26 people from refugee and asylum seeker backgrounds living in high-income countries with  
27 universal healthcare. Academic articles from six databases and grey literature from selected  
28 government websites were systematically searched for English-language articles published  
29 2012-2022. Articles describing perinatal care of people from refugee and asylum seeker  
30 backgrounds from the service user and service providers perspective were eligible for  
31 inclusion. A thematic synthesis of included articles was undertaken with study quality  
32 assessed using Critical Appraisal Sills Program tools.

33 Of the 37 included articles, there were seven qualitative, 15 quantitative, two mixed-methods  
34 studies and 13 reviews. Articles were conducted in Australia (57%), Canada (11%), and the  
35 remainder from Europe. Three recurring themes of communication, sociocultural and health  
36 system factors were described as barriers or challenges to antenatal care experiences but also  
37 presented opportunities for improving care. Many issues around antenatal care experiences  
38 for people from refugee and asylum seeker backgrounds remain the same as those identified  
39 over ten years ago. To improve antenatal care for people from refugee and asylum seeker  
40 backgrounds, health services could implement a range of strategies that support  
41 communication, sociocultural experiences and system-related issues.

42

## 43 Introduction

44 Antenatal care is essential for protecting and enhancing the perinatal health and wellbeing of  
45 parents and newborns. Even in high-income countries, people from refugee and asylum  
46 seeker backgrounds are at an increased risk of poor perinatal outcomes than the wider  
47 population.(1, 2) For example, refugees and asylum seekers experience more stillbirth (1),  
48 emergency caesarean sections,(3) and adverse neonatal outcomes(4) than the general  
49 population. While the reasons for such disparities in outcomes are likely to be varied and  
50 complex, it is known that people from a refugee and asylum seekers background have lower  
51 engagement with health services when pregnant,(5) even when antenatal care is universal.(6)  
52 Lower engagement may, in part, be due to the challenges of navigating health care when  
53 settling in a new country or because health services are not meeting the needs of people with  
54 a refugee or asylum seeker background. Thus, other services and supports may be needed to  
55 improve engagement with antenatal care by pregnant refugee and asylum seekers.

56

57 For all health services, culturally appropriate and culturally safe practices should be  
58 embedded in routine practice.(7) Australian clinical care recommendations have focused on  
59 the use of interpreters and, where possible, multicultural health workers.(7) In 2020, 35% of  
60 all births in Australia were by people who had been born in another country.(8) Despite  
61 ongoing changes to the patterns of refugee arrivals,(9) it has been many years since the  
62 Australian recommendations for antenatal care of refugee and asylum seekers have been  
63 updated. Thus, we sought to explore the recent experiences of antenatal care provision for  
64 refugee and asylum seekers, in health care settings similar to Australia. Applying the  
65 ‘population, concept, context’ framework, the relevant population are therefore people with  
66 refugee or asylum seeker backgrounds, the concept is the experience of antenatal care and the  
67 context is countries with universal health care.

68

## 69 Materials and methods

70 This rapid review was conducted in collaboration with the Multicultural and Refugee Health  
71 Service of the Illawarra Shoalhaven Local Health District in New South Wales, Australia.

72 The review had an eight-week timeline and intended to inform health service planning.

73 Protocol registration was not undertaken due to the short timeframe. The parameters for the  
74 review were discussed between academics and key health service staff (LP, NG) to ensure the  
75 review met the needs of the service. The review was conducted systematically, in accordance  
76 with procedures for rapid reviews.(10, 11) The review is reported according to the Preferred  
77 Reporting Items for Systematic Reviews and Meta-analyses.

78

## 79 Eligibility

80 Studies were included if they described the antenatal health care experiences of refugee or  
81 asylum seekers in developed countries that provided universal health care. Eligibility was  
82 open to systematic, umbrella, scoping or rapid reviews of relevant evidence, as well as  
83 empirical studies. Studies published from 2012 onwards were included to capture  
84 contemporaneous experiences. Studies were excluded if they did not distinguish the  
85 experience of refugee and/or asylum seekers from other immigrants, or if they were not  
86 published in English.

87

88 Where possible, we applied the UN definition for refugees as persons having a well-founded  
89 fear of persecution based on specific grounds and as asylum seekers as someone seeking  
90 refugee status. However, we acknowledge that some studies may not define refugee and  
91 asylum seeker status or their definition could differ from the internationally-accepted one.

92

## 93 Information sources

94 We searched databases that covered medical, nursing and midwifery, public health,  
95 psychology and social sciences, which included PubMed, CINAHL, Web of science,  
96 PsycINFO, Medline and Scopus. The date of the final database search was August 2022.  
97 Grey literature searches included Australian clinical practice guidelines and websites for  
98 nursing and midwifery, and for obstetrics.

99

## 100 Searches

101 The full search strategy for each database is available from the authors and hits associated  
102 with each database are included in the Online Supplementary Appendix A. The searches  
103 involved a combination of relevant population-level terms (e.g. refugee\* or asylum seeker\*),  
104 contact with service provision (health or care) and pregnancy-related terms (perinatal,  
105 pregnancy, early postpartum, prenatal, antenatal or gestation).

106

## 107 Screening

108 Database searches were combined in Endnote software (Version X9). Duplicates were  
109 removed using the Endnote function along with reviewing titles in alphabetical order. The  
110 final search was uploaded to Rayyan software (online version) for blind review by two  
111 authors (JG and LGS). Disagreements were resolved through discussion with a third  
112 researcher (JH) or health service staff (NG).

113

## 114 Data extraction

115 Information on each study was extracted systematically using a bespoke form that was pilot  
116 tested and included the following information: Citation information (e.g. author/s, year, title),  
117 type of sample (e.g. refugee, asylum seeker), country/region of research and country of origin  
118 for study sample, study aims, study design and data collection technique (e.g. focus group),  
119 sample size, outcomes and findings. Data were extracted independently by JG, NG and LS.  
120 Discrepancies were resolved through discussion with a third researcher (JH).

121

## 122 Critical appraisal

123 Study quality was assessed to describe the literature in this field. The quality of the included  
124 studies were evaluated with Critical Appraisal Skills Programme (CASP) tools.(12) Quality  
125 assessments of the academic literature were conducted independently by JH and LS.

126

## 127 Synthesis of results

128 An adaptation of Thomas and Harden's method of thematic synthesis was undertaken to  
129 summarise the results of the included articles.(13) The synthesis involved a familiarisation  
130 phase of reading and re-reading each article, coding or grouping similar results to develop  
131 descriptive themes, and reflection in conjunction with health service staff to summarise the  
132 final analytical themes. The quality assessments were incorporated into the synthesis through  
133 emphasising higher quality studies in the narrative.

134

## 135 Results

136 The searches yielded 1392 articles from which 37 full text articles were included (**Fig 1**).

137

138 **Fig 1. PRISMA flow chart**

139

140 **Table 1** describes characteristics of the included studies. These comprised 37 empirical  
141 articles of quantitative ( $k=7$  (19%)), qualitative ( $k=15$  (41%)) and mixed method ( $k=2$  (5%))  
142 research, and a further 13 articles that reported on multiple studies (scoping review ( $k=1$   
143 (3%)), non-systematic reviews ( $k=3$  (8%)) and systematic reviews ( $k=8$  (22%) and one  
144 systematic review for a national perinatal practice guideline). Most studies were conducted in  
145 Australia (21/37 (57%)) with articles also from Canada (4/37 (11%)), mixed countries 4/37  
146 (11%), United Kingdom (3/37 (8%)), Finland (2/37 (5%)), Germany (2/37 (5%)), and one  
147 each (3%) from Ireland and Sweden. Two articles (5%) involved interviews solely with  
148 health service or community workers, 30 (81%) with refugee and asylum seekers, and five  
149 (14%) involving both. Thirteen (35%) studies included refugee or asylum seekers from mixed  
150 countries of origin, 18 (49%) did not specify their country of origin and the remainder 6  
151 (16%) were of African and/or Middle-Eastern origin. The sample size in quantitative studies  
152 ranged from 179(5) to over 34,000 refugees,(3) with qualitative studies ranging from 6(14) to  
153 198.(15) Three recurring themes were reported across articles: communication, sociocultural  
154 and health systems factors.

155 **Table 1:** Characteristics of included studies ( $k = 37$ ) organised by whether it incorporates multiple studies or one empirical article

| First author (year)                                        | Country of research | Sample ( $k$ articles; $n$ participants)                          | Country of refugee population                                                                              | Study design      | Research information                                                                                       | Main findings                                                                                                                                                                                                                                                                   |
|------------------------------------------------------------|---------------------|-------------------------------------------------------------------|------------------------------------------------------------------------------------------------------------|-------------------|------------------------------------------------------------------------------------------------------------|---------------------------------------------------------------------------------------------------------------------------------------------------------------------------------------------------------------------------------------------------------------------------------|
| <b>Articles that synthesise multiple empirical studies</b> |                     |                                                                   |                                                                                                            |                   |                                                                                                            |                                                                                                                                                                                                                                                                                 |
| Balaam et al. (2022)                                       | Europe              | Refugee and asylum seeker<br>$k = 16$                             | NR                                                                                                         | Systematic review | Peer reviewed and grey literature<br>Database inception to 2020<br>English language<br>Qualitative studies | Paraprofessional health workers, community/peer support and less formal interactions valued. Cultural and language barriers resulted in isolation, loneliness, and lack of knowledge about the host country.                                                                    |
| Behboudi-Gandevani et al. (2022)                           | Mixed               | Migrants from conflict zone countries<br>$k = 40$                 | Afghanistan, Eritrea, Ethiopia, Iraq, Kosovo Nigeria, Pakistan, Somalia, Sudan, Syria,, Ukraine, and Yemen | Systematic review | Peer-reviewed<br>English language<br>From 2000 to 2020<br>Quantitative research.                           | Risk for small gestational age, stillbirth and perinatal morbidity higher amongst immigrants from conflict zones.                                                                                                                                                               |
| Billett et al. (2022)                                      | Australia           | Migrant and refugee backgrounds residing in Australia<br>$k = 27$ | NR                                                                                                         | Systematic review | Academic articles and grey literature<br>Language NR<br>Inception to 2020<br>Qualitative research          | Specialist services provided staff knowledge and cultural understanding, flexibility in appointment times, were designed with community participation, bicultural workers and interpreters and continuity of care. Trust between service users and medical staff highly valued. |
| Giscombe et al. (2020)                                     | United Kingdom      | Refugee and asylum seeker                                         | NR                                                                                                         | Systematic review | Academic and grey literature<br>English only                                                               | Both pre and post migration have mental health impacts.                                                                                                                                                                                                                         |



| First author (year)      | Country of research | Sample ( <i>k</i> articles; <i>n</i> participants)     | Country of refugee population | Study design                              | Research information                                                                           | Main findings                                                                                                                                                                                                                                                                                                                                   |
|--------------------------|---------------------|--------------------------------------------------------|-------------------------------|-------------------------------------------|------------------------------------------------------------------------------------------------|-------------------------------------------------------------------------------------------------------------------------------------------------------------------------------------------------------------------------------------------------------------------------------------------------------------------------------------------------|
|                          |                     | <i>k</i> = 8                                           |                               |                                           | 2007-2017<br>Predominantly quantitative research                                               | Social supports are a protective factor for mental health outcomes.                                                                                                                                                                                                                                                                             |
| Heslehurst et al. (2018) | United Kingdom      | Refugee and asylum seeker<br><i>k</i> = 29             | NR                            | Systematic review (of systematic reviews) | Academic research<br>English articles<br>2007 to 2017<br>Quantitative and qualitative research | Structural, social, personal and cultural barrier to access and use of care exist amongst migrant women. Relationship with healthcare providers and sensitivity to cultural difference noted as positive factors.                                                                                                                               |
| Iliadou et al. (2019)    | Europe              | Migrant and refugee<br><i>k</i> = 63                   | NR                            | Literature review                         | Peer-reviewed and grey literature<br>English articles<br>2002–2017<br>Qualitative research     | Major topics for mental health of pregnant immigrants and refugees: Prevalence and risk factors for antenatal mental disorders, assessment of mental disorders, healthcare professionals' training, and mental health interventions. Training in cultural competency is a requirement for effective healthcare, particularly for mental health. |
| Kasper et al. (2022)     | Germany             | Refugee, asylum seeker and migrant<br><i>k</i> = 16    | NR                            | Systematic review                         | Academic articles<br>English or German<br>1990 to 2019<br>Qualitative research                 | Collaboration between services, strong relationships, time, individualised care and continuity of care were all important factors.                                                                                                                                                                                                              |
| Khanlou (2017)           | Canada              | Migrant and refugee living in Canada<br><i>k</i> = 126 | NR                            | Scoping review                            | Peer-reviewed empirical articles and systematic reviews<br>English                             | Language, cultural differences and knowledge of health system,                                                                                                                                                                                                                                                                                  |

| First author (year)    | Country of research     | Sample ( <i>k</i> articles; <i>n</i> participants)         | Country of refugee population  | Study design              | Research information                                                                                   | Main findings                                                                                                                                                                                                                                                                                        |
|------------------------|-------------------------|------------------------------------------------------------|--------------------------------|---------------------------|--------------------------------------------------------------------------------------------------------|------------------------------------------------------------------------------------------------------------------------------------------------------------------------------------------------------------------------------------------------------------------------------------------------------|
|                        |                         |                                                            |                                |                           | 2000 to 2016<br>Qualitative, quantitative and mixed methods                                            | intersecting social experiences were barriers. Poorer perinatal health for refugee and key migrant groups. Country of origin is a strong determinant.                                                                                                                                                |
| Leppalla et al. (2019) | Sweden, Norway, Finland | Refugee<br><i>n</i> =198 women from 10 qualitative studies | 29 different countries         | Systematic review         | Peer-reviewed research<br>English<br>2013 to 2018<br>Qualitative research                              | Diminished negotiation power, sense of insecurity and care related discrimination were all barriers for humanitarian migrants.                                                                                                                                                                       |
| Pangas et al. (2019)   | Australia               | Refugee<br><i>k</i> = 25                                   | NR                             | Meta-ethnographic review  | Ethnographic research<br>English<br>2000 to 2017<br>Qualitative                                        | Maintenance of strong cultural identity was important. Difficulty in living between two cultures and negotiating new systems. Impact of trauma.                                                                                                                                                      |
| Rogers et al. (2020)   | Australia               | Migrant and refugee<br><i>k</i> = 17                       | NR                             | Systematic scoping review | Academic and grey literature<br>English<br>2008 to 2019<br>Qualitative, quantitative and mixed methods | having bilingual/bicultural workers, group antenatal care and specialised clinics, culturally responsive care, continuity of care, effective communication, psychosocial and practical support, support to navigate systems, and flexibility in access to services, were all valued by participants. |
| Coe (2021)             | Australia               | Refugees in Australia<br><i>k</i> = 7                      | Afghanistan, Sudan and Myanmar | Literature review         | Peer reviewed articles<br>English<br>2010 to 2020<br>Qualitative research                              | Proximity to service, specialised services (culturally sensitive and continuity of care), social supports, cultural identity                                                                                                                                                                         |

| First author (year)         | Country of research | Sample ( <i>k</i> articles; <i>n</i> participants) | Country of refugee population | Study design                         | Research information                                                                                                                                                         | Main findings                                                                                                                                                                                                                                                                                                                                                                                              |
|-----------------------------|---------------------|----------------------------------------------------|-------------------------------|--------------------------------------|------------------------------------------------------------------------------------------------------------------------------------------------------------------------------|------------------------------------------------------------------------------------------------------------------------------------------------------------------------------------------------------------------------------------------------------------------------------------------------------------------------------------------------------------------------------------------------------------|
|                             |                     |                                                    |                               |                                      |                                                                                                                                                                              | and strong relationship with staff were valued features. Access to appropriate translators.                                                                                                                                                                                                                                                                                                                |
| Tait (2013)                 | Australia           | Refugee<br><i>k</i> = NR                           | NR                            | Non-systematic review                | Article sources, dates, languages and data types NR                                                                                                                          | Importance of professional (not family) translators. Support for cultural training of staff. Awareness needed of pre-existing health issues.                                                                                                                                                                                                                                                               |
| Department of Health (2020) | Australia           | Migrant and refugee women<br><i>k</i> = NR         | NR                            | N/A, practice guidelines             | Details NR.<br>Last updated 2014                                                                                                                                             | First antenatal visit should have an accredited health interpreter. Multicultural health workers should be involved where possible. Recommends an individualised approach, and working to build trust with patient and explain what services are available. Consider external factors that impact access (e.g. transport). People from refugee backgrounds may face a range of external access challenges. |
| <b>Empirical research</b>   |                     |                                                    |                               |                                      |                                                                                                                                                                              |                                                                                                                                                                                                                                                                                                                                                                                                            |
| Markey et al. (2022)        | Ireland             | Migrants<br><i>n</i> = 52                          | NR                            | Participatory health research design | Perinatal mental health<br>3 online World café sessions (circa 2020)<br>Snowball sampling to capture diverse participation by migrants, health service and community workers | Collaborative whole system approach, cultural sensitivity, trauma informed care, relationships, trained translators and multi-                                                                                                                                                                                                                                                                             |

| First author (year)   | Country of research | Sample (k articles; n participants)                                                  | Country of refugee population | Study design                            | Research information                                                                                                                                                                                                                                                            | Main findings                                                                                                                                                                                                                          |
|-----------------------|---------------------|--------------------------------------------------------------------------------------|-------------------------------|-----------------------------------------|---------------------------------------------------------------------------------------------------------------------------------------------------------------------------------------------------------------------------------------------------------------------------------|----------------------------------------------------------------------------------------------------------------------------------------------------------------------------------------------------------------------------------------|
|                       |                     |                                                                                      |                               |                                         | Thematic analysis<br>Qualitative                                                                                                                                                                                                                                                | language resources, and opportunities to form social connections all valued                                                                                                                                                            |
| Leppala et al. (2022) | Finland             | Migrants from conflict zone countries<br>n = 3155 (refugee), n = 93600 (Finish born) | NR                            | Cross-sectional study of health records | Prenatal care<br>Birth registry data 2015-2016<br>Migrants vs Finnish-born women<br>Adjusted logistic regression analysis<br>Quantitative                                                                                                                                       | Migrants from conflict zones less likely to access available care, would access care later, and were less likely to attend the recommended number of check-ups                                                                         |
| Snow et al. (2021)    | Australia           | Refugee<br>n = 100 refugees, 100 Australian- born                                    | NR                            | Review of hospital records              | Psychosocial risk and perinatal mental health<br>Consecutive electronic records of refugee vs Australian-born women from July 2015 to April 2016<br>Analysis by Fishers Exact test<br>Quantitative                                                                              | Refugee participants less likely to report prior mental health issues and financial concerns. Had fewer social supports at antenatal assessment.                                                                                       |
| Henry et al. (2020)   | Germany             | Refugee<br>n = 12                                                                    | Iraq, Syria, Palestine        | Phenomenological design                 | Access & experience of health care and childbirth of Arabic-speaking women<br>Recruited via personal contacts, social workers, waiting room, referrals by refugees<br>Semi-structured interviews Aug-Sept 2017<br>Content analysis using Levesque's access model<br>Qualitative | Strong social support systems, language skills and literacy, continuity of care all led to positive outcomes for participants. Cultural differences in understanding healthcare, and language and access to translators were barriers. |
| Riggs et al. (2020)   | Australia           | Refugee<br>n = 30 (16 women, 14 men) and an 34 health professionals                  | Afghanistan                   | Participatory design                    | Access to health information<br>Snowball sampling beginning with community consultation (dates NR)<br>Semi-structured interviews and focus groups<br>Thematic analysis<br>Qualitative                                                                                           | Interpreters valued. Access to interpreters (particularly during birth) was a challenge. Participants unsure of role of health professional beyond direct healthcare.                                                                  |

| First author (year)       | Country of research | Sample ( <i>k</i> articles; <i>n</i> participants) | Country of refugee population | Study design                                   | Research information                                                                                                                                                                                                                  | Main findings                                                                                                                                                                                                                               |
|---------------------------|---------------------|----------------------------------------------------|-------------------------------|------------------------------------------------|---------------------------------------------------------------------------------------------------------------------------------------------------------------------------------------------------------------------------------------|---------------------------------------------------------------------------------------------------------------------------------------------------------------------------------------------------------------------------------------------|
| Bitar & Oscarsson (2020)  | Sweden              | Mostly refugee<br>n = 10                           | Mixed (Arabic speakers)       | Feasibility study                              | Communication using a tablet<br>Purposive sampling from antenatal clinics<br>Phone interviews Feb 2018 – Mar 2019 in Arabic translated to Swedish<br>Content analysis<br>Qualitative                                                  | Evaluation of using health information app. Overall positive feedback from service users for accessing accurate and consistent information about healthcare. Not for more complex questions.                                                |
| Yelland et al. (2020)     | Australia           | Refugee<br>n = 26 210 (2 740 refugees)             | Mixed, >35 countries          | Interrupted time series analysis               | Access to (number of) hospital-based antenatal visits<br>Routinely-collected hospital data 2014-2016<br>Refugee background vs Australian-born women<br>Logistic regression analysis<br>Quantitative                                   | Evaluation of systems reform in public hospitals. Improvements to attendance at antenatal visits, but steady decrease in proportion of people having their first hospital visit in the first trimester of pregnancy.                        |
| Leppalla et al. (2020)    | Finland             | Service providers only<br>n = 18                   | NR                            | Qualitative content analysis of interview data | Hindrances and facilitators to humanitarian migrant maternity care<br>Recruited via staff email (Nov 2017-Sept 2018)<br>Semi-structured interviews<br>Content analysis using the 3-delays model<br>Qualitative                        | Access to independent and competent translators, and the option of walk in clinics valued. Language, location and navigating bureaucracy were all barriers.                                                                                 |
| Malebranche et al. (2019) | Canada              | Refugee and asylum seeker<br>n = 179               | NR                            | Cohort study                                   | Antenatal care utilization and perinatal outcomes by government- or privately-sponsored refugees vs asylum seekers<br>Electronic medical record review 2011-2016<br>Unadjusted comparisons of outcomes between groups<br>Quantitative | Asylum seekers had more between arrival and first engagement with the service and were more likely to be recorded to have received inadequate care than refugees. No differences were found between asylum seekers and refugees in terms of |

| First author (year)  | Country of research | Sample (k articles; n participants)                                                                                       | Country of refugee population                                   | Study design                                       | Research information                                                                                                                                                                                                                                                                                                                                                          | Main findings                                                                                                                                                                                                                                                                                          |
|----------------------|---------------------|---------------------------------------------------------------------------------------------------------------------------|-----------------------------------------------------------------|----------------------------------------------------|-------------------------------------------------------------------------------------------------------------------------------------------------------------------------------------------------------------------------------------------------------------------------------------------------------------------------------------------------------------------------------|--------------------------------------------------------------------------------------------------------------------------------------------------------------------------------------------------------------------------------------------------------------------------------------------------------|
|                      |                     |                                                                                                                           |                                                                 |                                                    |                                                                                                                                                                                                                                                                                                                                                                               | obstetric and newborn outcomes.                                                                                                                                                                                                                                                                        |
| Rees et al. (2019)   | Australia           | Refugee and conflict-affected<br>n = 1335 (289 self-identified as refugees, 396 from conflict areas, 650 Australian born) | Arabic speaking countries, Sudan and Sri Lanka (Tamil-speaking) | Cross-sectional study                              | Major depressive disorders among refugee vs Australian-born<br>Consecutive refugee and conflict-affected women recruited by trained personnel at antenatal clinics, with parallel sampling of Australian-born via random computer selection procedure<br>Data collection Jan 2015-Mar 2016 by interview<br>Statistical comparisons of outcomes between groups<br>Quantitative | Refugee status associated with a range of intersecting social challenges (e.g. housing, and psychological intimate partner violence).<br>Higher rates of past trauma.<br>Less likely to have strong social supports.                                                                                   |
| Winn et al. (2018)   | Canada              | Service providers only<br>n=10                                                                                            | Mixed, Syria influx                                             | Qualitative thematic analysis of interview data    | Health care professionals experience of care for pregnant refugee women<br>Purposive snowballing of staff working at a specialist refugee clinic from 2012-2016<br>Semi-structured interviews<br>Thematic analysis<br>Qualitative                                                                                                                                             | Team-based approach, creative communication, developing rapport, commitment and dedication to refugees and extending hours helped service provision.<br>Language, family, culture, lack resources, complexity of health system, migration journey impacts health, and lack of knowledge were barriers. |
| Willey et al. (2018) | Australia           | Service providers only<br>n=26                                                                                            | NR                                                              | Inductive analysis of qualitative focus group data | Service provision to pregnant refugee families<br>Purposive sampling of maternal child health nurses via phone or email during May-Jun 2014<br>Six focus groups and individual questionnaires                                                                                                                                                                                 | Service flexibility, communication between services, cultural sensitivity and building relationships with families all valued.                                                                                                                                                                         |

| First author (year)       | Country of research | Sample (k articles; n participants)                                                                                                                                                                 | Country of refugee population | Study design                                    | Research information                                                                                                                                                                                                                                                                     | Main findings                                                                                                                                                                                                                                                                                                    |
|---------------------------|---------------------|-----------------------------------------------------------------------------------------------------------------------------------------------------------------------------------------------------|-------------------------------|-------------------------------------------------|------------------------------------------------------------------------------------------------------------------------------------------------------------------------------------------------------------------------------------------------------------------------------------------|------------------------------------------------------------------------------------------------------------------------------------------------------------------------------------------------------------------------------------------------------------------------------------------------------------------|
|                           |                     |                                                                                                                                                                                                     |                               |                                                 | Thematic analysis<br>Qualitative                                                                                                                                                                                                                                                         |                                                                                                                                                                                                                                                                                                                  |
| Wanigaratne et al. (2018) | Canada              | Refugee<br>n = 34 233 (refugee), n = 243 439 (non-refugee immigrants), n = 615 394 Canadian born                                                                                                    | Mixed                         | Population-based data linkage study             | Perinatal outcomes of refugee, non-refugee and Canadian mothers<br>Hospital birth records Apr 2002 - Mar 2014<br>Adjusted logistic regression and generalised estimating equations<br>Quantitative                                                                                       | Refugee status showed small associations with some adverse maternal and perinatal outcomes. Refugees also had higher rates of caesarean section, and moderate preterm birth. more detailed information about experiences is required to determine health needs for this cohort, rather than just refugee status. |
| Yelland et al. (2016)     | Australia           | Mostly refugee families, hospital and community-based health professionals<br>n = 64 (16 Afghan women, 14 Afghan men, 10 midwives, 5 medical practitioners, 19 community-based health professionals | Afghanistan                   | Thematic analysis of qualitative interview data | Communication during pregnancy, labour and birth<br>Recruitment of Afghans via advisory group, community groups and their leaders; health professionals via key contacts in organisation<br>In-depth interviews and focus groups conducted 2012-2013<br>Thematic analysis<br>Qualitative | Strong reliance on male partners to act as interpreters. Problematic in some scenarios. Extra time is needed for sessions with interpreters. Need for access to professional interpreters.                                                                                                                       |
| Riggs et al. (2016)       | Australia           | Refugee<br>n = 19                                                                                                                                                                                   | Myanmar                       | Co-designed program evaluation                  | Group-based antenatal program evaluation<br>Program participants were invited to participate (dates NR)<br>Two focus groups with semi-structured guide<br>Thematic analysis<br>Qualitative                                                                                               | Peer support model resulted in participants feeling better informed, more confident and better connected. Peer support program helped facilitate continuity of care.                                                                                                                                             |

| First author (year)           | Country of research | Sample ( <i>k</i> articles; <i>n</i> participants)                                                | Country of refugee population         | Study design                       | Research information                                                                                                                                                                                                                           | Main findings                                                                                                                                                                                                                                                                                         |
|-------------------------------|---------------------|---------------------------------------------------------------------------------------------------|---------------------------------------|------------------------------------|------------------------------------------------------------------------------------------------------------------------------------------------------------------------------------------------------------------------------------------------|-------------------------------------------------------------------------------------------------------------------------------------------------------------------------------------------------------------------------------------------------------------------------------------------------------|
| Owens et al. (2016)           | Australia           | Refugee and culturally and linguistically diverse migrants<br>n = 12                              | NR                                    | Phenomenological study             | Community-based antenatal program evaluation<br>Purpose sample of women who participated in program<br>Semi-structured interviews with interpreters Jun-Nov 2014<br>Thematic analysis using social constructionist epistemology<br>Qualitative | Community-based antenatal service that specialised in maternity care for CALD women was able to meet the needs of the service users. Using a social model of care focussed on continuity of care and holistic service delivery. Female doctors preferred.                                             |
| Lephard & Haith-Cooper (2016) | United Kingdom      | Asylum seeker<br>n = 6                                                                            | Sub-Saharan Africa and Eastern Europe | Hermeneutic phenomenological study | Maternity care experiences<br>Purposive and snowball sampling via flyers in children's centres<br>Semi-structured interviews<br>Thematic analysis<br>Qualitative                                                                               | Community midwives helped connect some participants to health services and to the community.<br>Barriers include communication, knowledge of the health system, associated costs (e.g. transport) social isolation, not being listened to. Sensitivity around female genital mutilation (FGM) needed. |
| Yelland et al. (2014)         | Australia           | Refugees and health professionals<br>n = 30 (Afghan men and women), n = 34 (health professionals) | Afghanistan                           | Participatory research             | Refugee families experience of maternity services<br>Purposive recruitment via community advisors, organisations, and key stakeholders (for health professionals)<br>Interviews and focus groups 2012-2013<br>Thematic analysis<br>Qualitative | Community based maternal and child health nurses had more capacity to work past the identified barriers as they had better access to interpreters, more time to build relationships with family, and a better understanding of the family's experiences. Healthcare services often                    |



| First author (year)       | Country of research | Sample (k articles; n participants)                                                                                                                                                                                                                                                              | Country of refugee population                                       | Study design                                    | Research information                                                                                                                                                                                                                              | Main findings                                                                                                                                                                                                                                                                                                                                                                                                                         |
|---------------------------|---------------------|--------------------------------------------------------------------------------------------------------------------------------------------------------------------------------------------------------------------------------------------------------------------------------------------------|---------------------------------------------------------------------|-------------------------------------------------|---------------------------------------------------------------------------------------------------------------------------------------------------------------------------------------------------------------------------------------------------|---------------------------------------------------------------------------------------------------------------------------------------------------------------------------------------------------------------------------------------------------------------------------------------------------------------------------------------------------------------------------------------------------------------------------------------|
|                           |                     |                                                                                                                                                                                                                                                                                                  |                                                                     |                                                 |                                                                                                                                                                                                                                                   | were shown to struggle more with providing the above components of healthcare.                                                                                                                                                                                                                                                                                                                                                        |
| Gibson-Helm et al. (2014) | Australia           | Refugee n = 2173 (n = 214 North African non- humanitarian source countries (HSC group), n = 1147 (North African HSC group), n = 619 (Middle and East African non-HSC group), n = 87 (Middle and East African HSC group), n = 61 (West African non-HSC group) and n = 45 (West African HSC group) | Africa                                                              | Electronic database of medical records          | Perinatal outcomes of migrants from Africa with and without refugee background<br>Birth data 2002-2011<br>Analysis by adjusted logistic and linear regression<br>Quantitative                                                                     | Poorer health outcomes, and higher frequencies of negative health experiences around pregnancy indicate that refugees from African regions face additional barriers compared to African migrants from non-refugee source countries. Socio-economic disadvantage, the need for interpreter, particular health needs around FGM and various health outcomes more common amongst refugees from some source countries compared to others. |
| Renzaho & Oldroyd (2013)  | Australia           | Migrant n = 35                                                                                                                                                                                                                                                                                   | Afghanistan, Africa, China, Palestine, Lebanon, Syria, Iran, Jordan | Thematic analysis of qualitative interview data | Sociocultural barriers and health needs in pregnancy and postnatal period<br>Participants recruited through playgroups 2010-2012<br>Five focus group discussions with interview schedule and bilingual worker<br>Thematic analysis<br>Qualitative | Importance of social connections and contacts for positive health. Need for service providers to understand diversity in what this looks like.                                                                                                                                                                                                                                                                                        |
| Niner & Kokanovic (2013)  | Australia           | Refugee and asylum seeker n = 15                                                                                                                                                                                                                                                                 | Myanmar                                                             | Thematic analysis of qualitative interview data | Birthing experience of Karen women in Australia<br>Purposive recruitment via community networks (dates NR)                                                                                                                                        | Past experiences of trauma, lack of knowledge of health system, language and access to translators and                                                                                                                                                                                                                                                                                                                                |

| First author (year)     | Country of research | Sample (k articles; n participants)                                                                                                                                                                     | Country of refugee population                  | Study design                                       | Research information                                                                                                                                                                                                                                                                                                                                                                                                | Main findings                                                                                                                                                                                                    |
|-------------------------|---------------------|---------------------------------------------------------------------------------------------------------------------------------------------------------------------------------------------------------|------------------------------------------------|----------------------------------------------------|---------------------------------------------------------------------------------------------------------------------------------------------------------------------------------------------------------------------------------------------------------------------------------------------------------------------------------------------------------------------------------------------------------------------|------------------------------------------------------------------------------------------------------------------------------------------------------------------------------------------------------------------|
|                         |                     |                                                                                                                                                                                                         |                                                |                                                    | Interviews in Karen with a bilingual researcher<br>Thematic analysis<br>Qualitative                                                                                                                                                                                                                                                                                                                                 | perceived negligence of staff all impacted participants engagements in Australia. Strong feelings of gratitude, self-reliance and stoicism amongst participants.                                                 |
| Stapleton et al. (2013) | Australia           | Refugee women (quant) n = 190<br>Other women (quant) n = 4158<br>Refugee women (qual) = 18<br>Staff n = 5<br>Researchers and community workers n = 10<br>Service user survey = 42<br>Staff survey = 147 | Somali, Sudanese, Afghan, Burundi, and Liberia | Mixed methods                                      | Cross cultural use of EPDS<br>Recruitment information NR<br>8 focus groups, surveys by women and staff, medical record audit of refugee and other women; dates NR<br>Thematic analysis of qualitative data;<br>descriptive analysis of quantitative data<br>Quantitative and Qualitative                                                                                                                            | Cultural sensitivity and impact of cultural differences needs to be acknowledged and catered for (e.g. understanding of collective rather than individualistic cultural norms)                                   |
| Stapleton (2013)        | Australia           | Refugee women n = 42<br>Other women n = 4158<br>Hospital staff n = 150<br>Interpreters n = 2<br>Community stakeholders n = 5                                                                            | Mixed                                          | Mixed methods using data from a program evaluation | Refugee women's experiences of antenatal clinics<br>Refugee women recruited through family and community networks, staff via workplace communications and emails<br>8 focus groups, surveys by women and staff, medical record audit of refugee and other women; collected Jan 2009-May 2010<br>Thematic analysis of qualitative data;<br>descriptive analysis of quantitative data<br>Quantitative and qualitative | Continuity of care, personalised care, and flexibility all highly valued by participants. Staff training and accessible location of service recommended.<br>Acknowledgement that these features often cost more. |

## 157 Communication

158 Many articles noted language and communication as a barrier to perinatal care(15-31) and  
159 identified opportunities to improve communication through translators. Language challenges  
160 experienced at booking in particular created difficulties in managing appointments and  
161 knowing what services are available.

162

163 Studies noted that people from refugee and asylum seeker backgrounds take longer to engage  
164 with antenatal services than the general population, access less healthcare overall, and less  
165 healthcare than recommended.(6, 32) In addition to difficulties with knowing what services  
166 are available or how to access them,(14-16, 18, 25, 26, 28, 33) uncertainty about their  
167 residency status meant that people from a refugee or asylum seeker background did not  
168 consistently know what they were allowed to access, or whether their access rights may have  
169 changed over time.(14, 22, 26) These issues may be overcome by ensuring additional time is  
170 provided at the point of initial service engagement and throughout the perinatal period to  
171 explain the health care system and what birthing in a local hospital is like.(34) A strong  
172 relationship with a healthcare provider supports people from a refugee and asylum seeker in  
173 finding information and services they need from pregnancy to infant wellbeing.(21, 25, 35)

174

175 Providing information about services and accessibility in a variety of languages and formats  
176 was consistently identified as important for reducing the information needed to be covered by  
177 translators. However, low literacy among some people from a refugee background meant that  
178 written materials remained inaccessible.(19, 20) Access to professional translators helped  
179 ensure accurate and confidential information was being communicated between service users  
180 and healthcare professionals, although issues of concern included availability of  
181 translators,(1) their ability to communicate in the same dialect,(6) and their age and gender

182 appropriateness.(1, 18) Appointments facilitated by translators took longer,(28, 36) but this  
183 was not discussed as having been accounted for with longer appointment times.(34, 36)  
184 Family members (particularly male partners) often acted as a translator, which was a practice  
185 supported by participants.(21) However, when family members acted as translators, health  
186 providers expressed concern about the accuracy of the information being translated,(37)  
187 whether true informed consent to medical treatments was provided,(38) and privacy when  
188 discussing sensitive issues such as domestic or family violence.(39)

189

## 190 Sociocultural

191 Common concepts raised in the included studies involved acknowledging culture, providing  
192 culturally-sensitive care and avoiding cultural stereotyping. The combination of best-practice  
193 care delivered in a culturally-safe manner was highly valued by people from refugee  
194 backgrounds.(18, 35, 38) Several studies cited maintenance of a strong cultural identity,(19)  
195 and feelings of self-reliance and stoicism(36, 40) among participants. Some reported the  
196 feeling of living between two cultures, which was challenging to navigate.(36)

197

198 Some articles noted that cultural practices around pregnancy and childbirth were not possible  
199 for some people from refugee backgrounds. For example, the involvement of older female  
200 family members (for support and guidance) was not possible if those relatives did not live in  
201 Australia, which was upsetting.(20) The role of family during pregnancy and birth caused  
202 conflict between some participants from refugee backgrounds and their healthcare providers,  
203 particularly among less individualised cultures (than, for example, Australia).(18, 19, 36, 41)  
204 Health care providers' acknowledgement of cultural challenges was an important element of  
205 person-centred culturally-responsive care,(18, 20) and was facilitated by the formation of  
206 strong and safe relationships between service providers and service users, cultural sensitivity

207 and clear communication about the host country health system. When information or services  
208 differed from participants expectations, conflicted with their cultural understanding, or were  
209 not thoroughly explained in a culturally safe way, it often led to the person refusing or  
210 ignoring the advice, or feelings of isolation, sadness and of not being heard.(14, 26, 30, 35)  
211 Culturally-responsive care was underscored by ongoing staff training around cultural  
212 differences and providing trauma informed care.(19, 33, 34, 42) Barriers were identified  
213 around understandings of mental health and stigma in discussing mental health concerns.(25,  
214 43) with staff training considered important for identifying mental health concerns.(42)  
215 Avoiding cultural stereotyping or making assumptions about cultural backgrounds or refugee  
216 experiences was also important.(17, 25, 26, 31)

217

218 Socioeconomic factors were associated with the refugee experiences and also impacted on  
219 access to healthcare. Examples include unstable, uncertain or unsuitable housing, transport  
220 challenges and costs, and experiences of poverty.(4, 14, 18, 19, 22, 25, 26, 35) Refugee and  
221 asylum seekers expressed concern about costs of services (or assumed costs if they were  
222 unsure of their entitlements),(14) although this varied by country.(3)

223

## 224 System

225 The included articles identified a range of system-level influences such as staff-related  
226 factors, services that provide collaborative and holistic care, and offered continuity of care.  
227 Refugee and asylum seekers may have a limited understanding of how the health system of  
228 their host country functions, the medical model of childbirth and the different role/s different  
229 healthcare workers and services. Providing information about these systems may remove  
230 barriers and improve trust.(15)

231

232 Having staff who understand and act on the needs of people from refugee and asylum seeker  
233 backgrounds was identified as essential for optimal and effective healthcare.(14, 17, 24) The  
234 included articles discussed training in cultural responsiveness and trauma-informed care  
235 (particularly on mental health problems and parenting) as well as providing culturally-  
236 sensitive care.(31, 33, 34) Culturally competent care should be individualised rather than  
237 generalised to avoid cultural stereotyping of an individuals' cultural background or refugee  
238 experience.(17) Other challenges for healthcare staff include having sufficient knowledge and  
239 resources for responding to non-clinical needs such as access to social supports,(17, 29) and  
240 responding sensitively to specific issues such as female genital mutilation.(14, 18, 31)  
241  
242 Services that were valued by people from refugee and asylum seeker backgrounds included  
243 continuity of care,(17-20, 27, 28, 34, 38) collaborative care,(17, 28, 33) working in  
244 multidisciplinary teams,(14, 16, 18) and paraprofessional health advocates. Continuity of care  
245 was noted as particularly important for strengthening relationships between healthcare  
246 workers and refugees. Often, specialist services were set up well to provide this model of  
247 care,(18) largely due to their capacity to provide flexible and more personalised care. This  
248 demonstrated a strong commitment to people from refugee and asylum seeker backgrounds  
249 and built trust. Collaboration between medical and social services helped people access  
250 health services unrelated to their pregnancy and social supports beyond healthcare.(19, 27,  
251 28, 43) Models of care that included social elements were reported to be better equipped at  
252 providing for social needs than hospitals. Sometimes these models were created through a co-  
253 design approach.(28, 38) Paraprofessionals helped facilitate connection, trust and continuity  
254 for people from a refugee background with the health service.(16) Community-based nurses  
255 were often thought to have better access to interpreters, more time to build relationships and a  
256 better understanding of the family's experiences.(29)

257

258 While a range of services may be available, many services work in silos, which limits  
259 collaboration and sharing of expertise and access to services.(33) Continuity of care  
260 supported positive relationships between the healthcare provider and people from refugee and  
261 asylum seeker backgrounds and improved rapport.(27) A specialist service involving  
262 translators or bilingual workers was supportive of provider-patient rapport.(20) Better  
263 coordination of care between services, and communicating the specific needs of individuals  
264 from refugee backgrounds, may improve care and barriers to access.(17) Collaborative  
265 models engaged with community organisations (e.g. playgroups, religious groups and  
266 multicultural centres) fostered connections between community and services, and could  
267 connect people from refugee and asylum seeker backgrounds in both directions, by acting as  
268 referral pathways to better improve service access and by providing culturally-accessible  
269 education programs, specialist group clinics and community-based pregnancy support.(35)

270

271 Flexible services in accessible locations were highly supported by people from refugee  
272 backgrounds as they enabled greater access and engagement with services.(18, 34, 35, 38)  
273 Service location mattered as transport to services can be a barrier to access,(34, 35) and  
274 services with flexible appointment scheduling were important.(34, 35) Furthermore, services  
275 that provided a range of medical and social supports enabled refugees to access health  
276 services unrelated to their pregnancy.(19, 27, 28, 43) As refugee and asylum seekers  
277 experience social isolation,(18, 43) services that helped connect with people who spoke their  
278 language or had shared experiences were valued.(14, 19, 20, 27)

279

280 None of the included articles focussed specifically on experiences of racism within the  
281 healthcare system, beyond identifying where the healthcare provided was not culturally

282 sensitive. Experiences of discrimination impact upon refugee and asylum seekers trust in host  
283 country services.(2, 15, 18, 25, 30) And where mistrust in authority and government occurs in  
284 their home countries, negative experiences in the host country can exacerbate refugees lack of  
285 trust and result in poorer healthcare.(15)

286

## 287 Study quality

288 Assessment of each article's quality is shown in **Online Supplementary Appendix B Table**  
289 **S2**, as a function of study design. Most studies were rated as medium quality, with clear aims,  
290 appropriate methods, and valid data. Potential biases during recruitment or design stages were  
291 common, including a lack of detail on how refugee status was defined(5) and the broad use of  
292 convenience sampling methods in qualitative studies, such as personal networks,(20, 39)  
293 recruiting through a specialist playgroup(40) or referrals received from community members,  
294 social workers or health care professionals.(20, 28, 30) In many studies the impact of these  
295 pre-existing relationships on design decisions or the generalisability of the results was not  
296 given adequate consideration.(14, 27, 29, 30, 33, 37) While most studies reported findings of  
297 local relevance, a few exceptions were noted for very small ( $n = 6$ ) interview studies(14) and  
298 reviews incorporating papers with migrants from a wide range of conflict zones(1) or host  
299 countries with a vastly different healthcare system than Australia (e.g. USA)(38). Older  
300 studies were rated as lower quality(30, 31, 34)because they reported less detail on design and  
301 analysis decisions, potentially reflecting changes in publishing norms. The grey literature(7)  
302 was assessed as low quality due to the rapid review format and presentation style but was of  
303 the highest local relevance.

304



## 305 Discussion

306 In the current scoping review, we identified 37 articles reporting various aspects of perinatal  
307 care for people from refugee and asylum seeker backgrounds. Although articles were  
308 published from many different countries, three recurring themes were identified. These  
309 included challenges with communication, sociocultural and health care system factors.  
310 Research quality was moderate, with most articles reporting well-defined aims, appropriate  
311 designs, and being of value. We identified potential biases from pre-existing relationships on  
312 recruitment, design decisions and generalizability of the data. Taking a strengths-based  
313 perspective, evidence from the three main themes present a range of opportunities to improve  
314 antenatal care experiences. Translators and multicultural health workers can support  
315 communication. Acknowledging culture, training and delivering culturally-safe and trauma-  
316 informed care were important for building trust and maintaining engagement with services.  
317 Providing information about the health system and healthcare providers' roles in the host  
318 country may be helpful. Working collaboratively with other health, social and community  
319 services and providing continuity of care in convenient locations were highly valued.  
320 Although catering to diverse service users can be problematic, improving staff access to  
321 resources perhaps through resource sharing across institutes and providing staff professional  
322 development are addressable health service factors.

323  
324 Although a third of the included articles involved reviews or meta-syntheses of individual  
325 studies, our review is distinct because we focus on the *experience* of perinatal care rather than  
326 specific perinatal outcomes (e.g. postnatal depression, caesarean section) and our target  
327 population are refugee and asylum seekers rather than general migrant populations. Despite  
328 the different focus, we report consistencies with past reviews. For example, Heslehurst et al  
329 conducted a review of systematic reviews and, consistent with the current review, issues

330 raised included communication challenges, a lack of cultural knowledge and sensitivity,  
331 cultural stigma and stereotyping, the importance of supportive relation with practitioners, and  
332 a desire for integrated care and ability to include cultural practices in the host settings.(25)  
333 Reviews that included older literature raised similar concerns such as sociocultural challenges  
334 associated with migrating to a Western country,(44) engagement with antenatal care could be  
335 improved with culturally-sensitive, non-stigmatising care and collaboration with other  
336 (community) agencies.(45) Wikberg & Bondas(46) discussed issues of respect, active  
337 listening and socioeconomic disadvantage. Thus, although the literature included in these  
338 reviews was ineligible for the current study because they were published over 10 years ago,  
339 the consistency with the current review suggests that improving antenatal care for migrant,  
340 refugee and asylum seeker people has been slow and many issues remain unaddressed.  
341  
342 Notably, most empirical research targeted refugee and asylum seekers from mixed countries  
343 of origin. The implications of this are that the current body of research will reflect more  
344 generalised experiences that are not specific to particular cultural groups. This is both a  
345 strength and a weakness of the research to date and its ability to inform clinical practice. On  
346 one hand, high income countries that offer universal health care must provide perinatal care  
347 to service users from diverse backgrounds. Hence the findings of this review are applicable to  
348 a similarly ‘general’ group from which it was derived. Yet, the backgrounds, cultural  
349 practices and health care needs are sometimes unique to particular cultural groups, which  
350 means we have less specific information on how to improve clinical care for such groups.  
351  
352 A challenge with the literature in this area is that there is no consistent definition of refugee  
353 and asylum seekers. Many empirical articles and reviews often do not define people from  
354 refugee or asylum seeker backgrounds, and there is no standard or agreed way of asking

355 about migration status and refugee experience.(29) which may lead to challenges in providing  
356 tailored service responses. Implications for the current review are while participants differ  
357 across studies, the similarities in themes across studies suggests this has largely not impacted  
358 review findings. Other limitations of this review include the 10-year time horizon, limiting to  
359 English language publications and high-income countries with universal health care. These  
360 constraints were imposed to ensure the review was contemporary, a manageable size and  
361 expense, and able to inform innovations to current practice in an Australian setting. This  
362 review is likely to be of use to similar settings, such as the New Zealand, UK and Canadian  
363 health services.

364

## 365 Conclusion

366 Key themes relating to the experience of antenatal care for people from refugee and asylum  
367 seeker backgrounds involve communication, sociocultural and systems-level factors. While  
368 elements of these themes are similar to those identified over ten years ago, the evidence  
369 synthesised here suggests that strategies are available for health services to address these  
370 issues and improve the antenatal care experience for people from refugee and asylum seeker  
371 backgrounds.

372

## 373 Acknowledgements

374 We would like to acknowledge the health service advice and feedback on our manuscript  
375 from Dr Smriti Jaiswal.

376

## 377 Supporting information

378 S1. Search strategy and summary of hits.

379 **S2. Quality assessments for quantitative and qualitative studies, and reviews.**

380

381

## 382 References

- 383 1. Behboudi-Gandevani S, Bidhendi-Yarandi R, Panahi MH, Mardani A, Prinds C,  
384 Vaismoradi M. Perinatal and Neonatal Outcomes in Immigrants From Conflict-Zone  
385 Countries: A Systematic Review and Meta-Analysis of Observational Studies.  
386 FRONTIERS IN PUBLIC HEALTH. 2022;10.
- 387 2. Giscombe T, Hui A, Stickley T. Perinatal mental health amongst refugee and asylum-  
388 seeking women in the UK. *Ment Health Rev J*. 2020;25(3):241-53.
- 389 3. Wanigaratne S, Shakya Y, Gagnon AJ, Cole DC, Rashid M, Blake J, et al. Refugee  
390 maternal and perinatal health in Ontario, Canada: a retrospective population-based  
391 study. *BMJ Open*. 2018;8(4):e018979.
- 392 4. Gibson-Helm M, Teede H, Block A, Knight M, East C, Wallace EM, et al. Maternal  
393 health and pregnancy outcomes among women of refugee background from African  
394 countries: a retrospective, observational study in Australia. *BMC Pregnancy Childbirth*.  
395 2014;14:392.
- 396 5. Malebranche M, Norrie E, Hao S, Brown G, Talavlikar R, Hull A, et al. Antenatal Care  
397 Utilization and Obstetric and Newborn Outcomes Among Pregnant Refugees Attending  
398 a Specialized Refugee Clinic. *J Immigr Minor Health*. 2020;22(3):467-75.
- 399 6. Leppälä S, Lamminpää R, Gissler M, Vehviläinen-Julkunen K. Prenatal care adequacy  
400 of migrants born in conflict-affected countries and country-born parturients in Finland.  
401 *J Migr Health*. 2022;6:100122.
- 402 7. Australian-Government. Clinical Practice Guidelines: Pregnancy Care. In: Health Do,  
403 editor. 2020 edition ed. Australia2020.
- 404 8. Australian-Government. Australia's Mothers and Babies In: Welfare AIoHa, editor.  
405 2022.

- 406 9. Australian-Government. Visa statistics: Humanitarian Program [Data reports].  
407 Australia2022 [Statistical information on visit, study, work, migration and  
408 humanitarian visas.]. Available from: [https://www.homeaffairs.gov.au/research-and-](https://www.homeaffairs.gov.au/research-and-statistics/statistics/visa-statistics/live/humanitarian-program)  
409 [statistics/statistics/visa-statistics/live/humanitarian-program](https://www.homeaffairs.gov.au/research-and-statistics/statistics/visa-statistics/live/humanitarian-program).
- 410 10. Tricco AC, Langlios EV, Straus SE. Rapid reviews to strengthen health policy and  
411 systems: a practical guide. Geneva: World Health Organization; 2017.
- 412 11. Dobbins M. Rapid Review Guidebook. Ontario: National Collaborating Centre for  
413 Methods and Trials  
414 McMaster University; 2017. p. 26.
- 415 12. Critical-Appraisal-Skills-Programme. CASP Checklists. 2022 [Available from:  
416 <https://casp-uk.net/casp-tools-checklists/>].
- 417 13. Thomas J, Harden A. Methods for the thematic synthesis of qualitative research in  
418 systematic reviews. BMC Medical Research Methodology. 2008;8(1):45.
- 419 14. Lephard E, Haith-Cooper M. Pregnant and seeking asylum: Exploring women's  
420 experiences 'from booking to baby'. British Journal of Midwifery. 2016;24(2):130-6.
- 421 15. Leppälä S, Lamminpää R, Gissler M, Vehviläinen-Julkunen K. Humanitarian migrant  
422 women's experiences of maternity care in Nordic countries: A systematic integrative  
423 review of qualitative research. Midwifery. 2020;80:102572.
- 424 16. Balaam M-C, Kingdon C, Haith-Cooper M. A Systematic Review of Perinatal Social  
425 Support Interventions for Asylum-seeking and Refugee Women Residing in Europe.  
426 Journal of Immigrant & Minority Health. 2022;24(3):741-58.
- 427 17. Kasper A, Mohwinkel L-M, Nowak AC, Kolip P. Maternal health care for refugee  
428 women - A qualitative review. Midwifery. 2022;104:103157.

- 429 18. Billett H, Vazquez Corona M, Bohren MA. Women from migrant and refugee  
430 backgrounds' perceptions and experiences of the continuum of maternity care in  
431 Australia: A qualitative evidence synthesis. *Women Birth*. 2022;35(4):327-39.
- 432 19. Coe R. WHAT DO REFUGEE WOMEN IN AUSTRALIA WANT FROM  
433 ANTENATAL CARE? AN OVERVIEW OF RECENT LITERATURE. *Australian  
434 Midwifery News*. 2021;23(1):20-3.
- 435 20. Henry J, Beruf C, Fischer T. Access to Health Care for Pregnant Arabic-Speaking  
436 Refugee Women and Mothers in Germany. *Qual Health Res*. 2020;30(3):437-47.
- 437 21. Riggs E, Yelland J, Szwarc J, Duell-Piening P, Wahidi S, Fouladi F, et al. Afghan  
438 families and health professionals' access to health information during and after  
439 pregnancy. *Women Birth*. 2020;33(3):e209-e15.
- 440 22. Leppälä S, Lamminpää R, Gissler M, Vehviläinen-Julkunen K. Hindrances and  
441 facilitators in humanitarian migrants' maternity care in Finland: qualitative study  
442 applying the three delays model framework. *Scand J Caring Sci*. 2020;34(1):148-56.
- 443 23. Winn A, Hetherington E, Tough S. Systematic Review of Immigrant Women's  
444 Experiences With Perinatal Care in North America. *J Obstet Gynecol Neonatal Nurs*.  
445 2017;46(5):764-75.
- 446 24. Winn A, Hetherington E, Tough S. Caring for pregnant refugee women in a turbulent  
447 policy landscape: perspectives of health care professionals in Calgary, Alberta. *Int J  
448 Equity Health*. 2018;17(1):91.
- 449 25. Heslehurst N, Brown H, Pemu A, Coleman H, Rankin J. Perinatal health outcomes and  
450 care among asylum seekers and refugees: a systematic review of systematic reviews.  
451 *BMC Med*. 2018;16(1):89.

- 452 26. Khanlou N, Haque N, Skinner A, Mantini A, Kurtz Landy C. Scoping Review on  
453 Maternal Health among Immigrant and Refugee Women in Canada: Prenatal,  
454 Intrapartum, and Postnatal Care. *J Pregnancy*. 2017;2017:8783294.
- 455 27. Riggs E, Muyeen S, Brown S, Dawson W, Petschel P, Tardiff W, et al. Cultural safety  
456 and belonging for refugee background women attending group pregnancy care: An  
457 Australian qualitative study. *Birth*. 2017;44(2):145-52.
- 458 28. Owens C, Dandy J, Hancock P. Perceptions of pregnancy experiences when using a  
459 community-based antenatal service: A qualitative study of refugee and migrant women  
460 in Perth, Western Australia. *Women Birth*. 2016;29(2):128-37.
- 461 29. Yelland J, Riggs E, Wahidi S, Fouladi F, Casey S, Szwarc J, et al. How do Australian  
462 maternity and early childhood health services identify and respond to the settlement  
463 experience and social context of refugee background families? *BMC Pregnancy*  
464 *Childbirth*. 2014;14:348.
- 465 30. Niner S, Kokanovic R, Cuthbert D. Displaced mothers: birth and resettlement, gratitude  
466 and complaint. *Med Anthropol*. 2013;32(6):535-51.
- 467 31. Tait P. Refugee Women in Australia and Woman-Centered Midwifery Care. *Nuritinga*.  
468 2013(12):31-9.
- 469 32. Khan S, Yao Z, Shah BR. Gestational diabetes care and outcomes for refugee women: a  
470 population-based cohort study. *Diabet Med*. 2017;34(11):1608-14.
- 471 33. Markey K, Noonan M, Doody O, Tuohy T, Daly T, Regan C, et al. Fostering Collective  
472 Approaches in Supporting Perinatal Mental Healthcare Access for Migrant Women: A  
473 Participatory Health Research Study. *Int J Environ Res Public Health*. 2022;19(3).
- 474 34. Stapleton H, Murphy R, Correa-Velez I, Steel M, Kildea S. Women from refugee  
475 backgrounds and their experiences of attending a specialist antenatal clinic. Narratives  
476 from an Australian setting. *Women Birth*. 2013;26(4):260-6.



- 477 35. Willey SM, Cant RP, Williams A, McIntyre M. Maternal and child health nurses work  
478 with refugee families: Perspectives from regional Victoria, Australia. *J Clin Nurs*.  
479 2018;27(17-18):3387-96.
- 480 36. Pangas J, Ogunsiji O, Elmir R, Raman S, Liamputtong P, Burns E, et al. Refugee  
481 women's experiences negotiating motherhood and maternity care in a new country: A  
482 meta-ethnographic review. *Int J Nurs Stud*. 2019;90:31-45.
- 483 37. Bitar D, Oscarsson M. Arabic-speaking women's experiences of communication at  
484 antenatal care in Sweden using a tablet application—Part of development and  
485 feasibility study. *Midwifery*. 2020;84.
- 486 38. Rogers HJ, Hogan L, Coates D, Homer CSE, Henry A. Responding to the health needs  
487 of women from migrant and refugee backgrounds—Models of maternity and  
488 postpartum care in high-income countries: A systematic scoping review. *Health &*  
489 *Social Care in the Community*. 2020;28(5):1343-65.
- 490 39. Yelland J, Mensah F, Riggs E, McDonald E, Szwarc J, Dawson W, et al. Evaluation of  
491 systems reform in public hospitals, Victoria, Australia, to improve access to antenatal  
492 care for women of refugee background: An interrupted time series design. *PLoS Med*.  
493 2020;17(7):e1003089.
- 494 40. Renzaho AMN, Oldroyd JC. Closing the gap in maternal and child health: A qualitative  
495 study examining health needs of migrant mothers in Dandenong, Victoria, Australia.  
496 *Matern Child Health J*. 2014;18(6):1391-402.
- 497 41. Stapleton H, Murphy R, Kildea S. Lost in translation: staff and interpreters' experiences  
498 of the edinburgh postnatal depression scale with women from refugee backgrounds.  
499 *Issues Ment Health Nurs*. 2013;34(9):648-57.

- 500 42. Iliadou M, Papadakaki M, Sioti E, Giaxi P, Leontitsi E, Petelos E, et al. Addressing  
501 mental health issues among migrant and refugee pregnant women: A call for action.  
502 Eur J Midwifery. 2019;3:9.
- 503 43. Snow G, Melvin GA, Boyle JA, Gibson-Helm M, East CE, McBride J, et al. Perinatal  
504 psychosocial assessment of women of refugee background. Women Birth.  
505 2021;34(3):e302-e8.
- 506 44. Wittkowski A, Patel S, Fox JR. The Experience of Postnatal Depression in Immigrant  
507 Mothers Living in Western Countries: A Meta-Synthesis. Clin Psychol Psychother.  
508 2017;24(2):411-27.
- 509 45. Downe F, Walsh, Lavender. ‘Weighing up and balancing out’: a metasynthesis of  
510 barriers to antenatal care for marginalised women in high-income countries. BJOG An  
511 International Journal of Obstetrics and Gynaecology. 2009;116(4):518-29.
- 512 46. Wikberg B. A patient perspective in research on intercultural caring in maternity care:  
513 A meta-ethnography. International Journal of Qualitative Studies on Health and Well-  
514 being. 2010;5(1).
- 515

## 516 Supporting information

### 517 **Appendix A: Search strategy description and hits**

518 Table S1: Summary of hits for each database

519

### 520 **Appendix B: Quality assessments for quantitative and qualitative studies, and reviews**

521 Table S2: Summary of quality assessments for quantitative studies

522 Table S3: Summary of quality assessments for qualitative studies

523 Table S4: Summary of quality assessments for review articles

## Identification

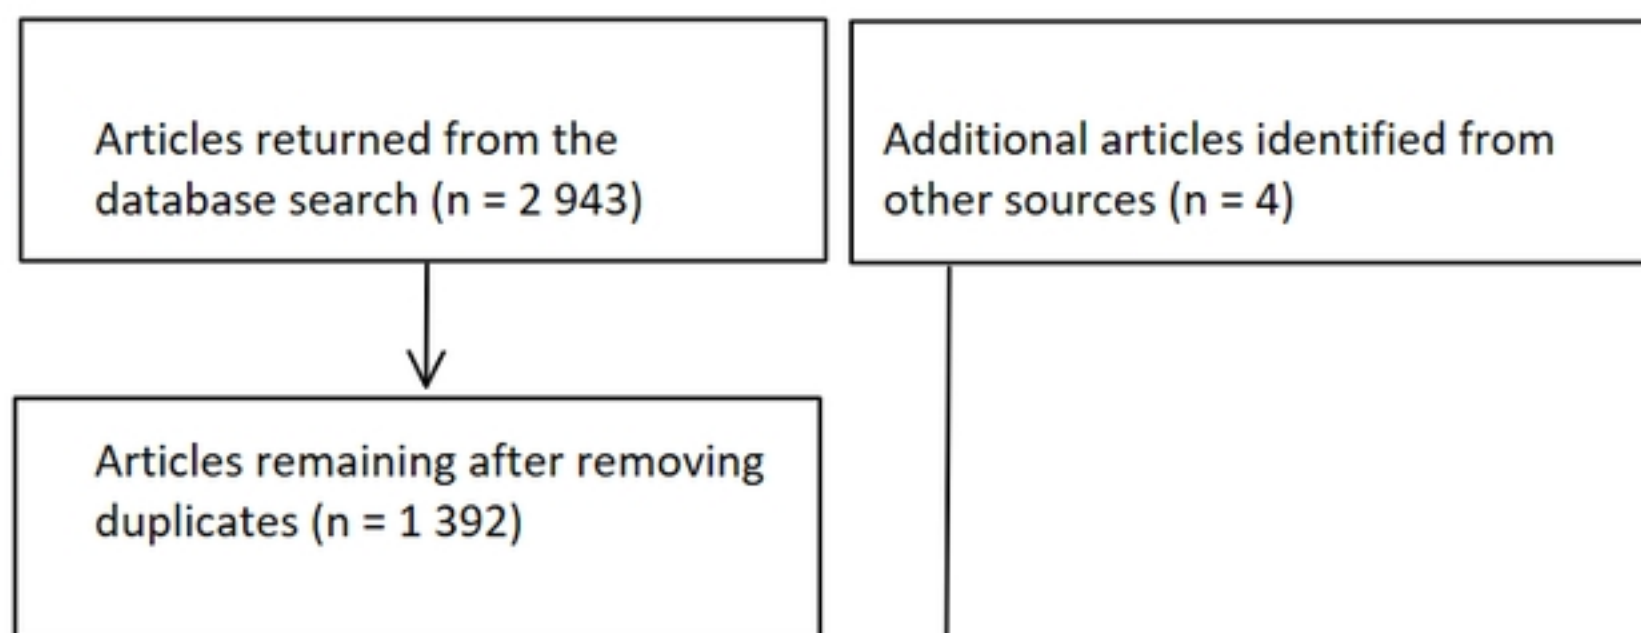

## Screening

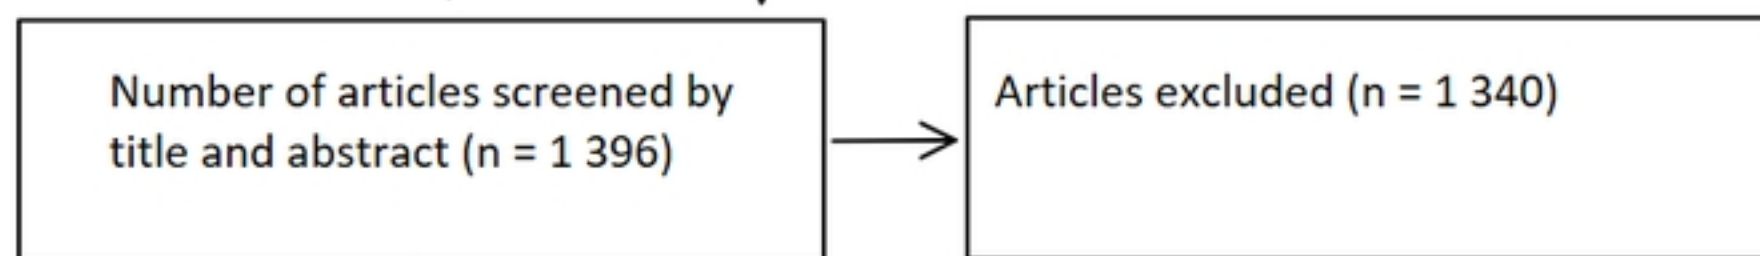

## Eligibility

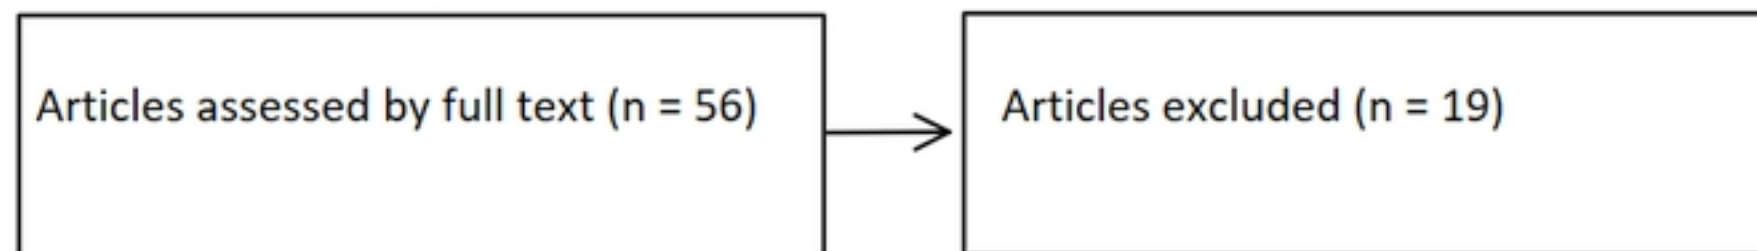

## Inclusion

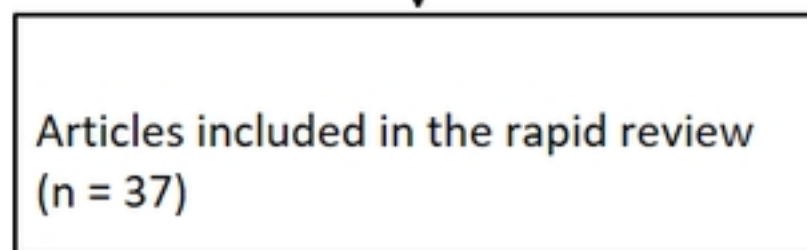

Fig 1
